# Supplementary material
Source: Springer Nature journal article supplement (https://www.springermedizin.de/resource/supplementary/12875_2013_956_MOESM2_ESM.pdf/9435496)
Supplement: MOESM2 [file 9435496]

**The assessment of symptom stakes place in a complex interplay between:**

- Presented symptom characteristics
- Objective findings
- Poorly explored associated factors, e.g. experience, context, knowledge about patient, likelihood estimations

**Sensation ↔ Symptom ↔ Disease**

Are presented symptoms indicative of disease?

Might experienced bodily sensations be symptoms of disease?

**The interpretation of bodily sensations as symptoms takes place in a complex interplay between:**

- Biological factors
- Psychological factors
- Social and cultural factors

**Healthcare professional**

**Patient**
